# Supplementary material for: Muscle-Specific SIRT1 Gain-of-Function Increases Slow-Twitch Fibers and Ameliorates Pathophysiology in a Mouse Model of Duchenne Muscular Dystrophy
Source: PubMed Central journal article supplement (PMC4102452; doi:10.1371/journal.pgen.1004490), 2014-07-17

# Supplementary Figure 2

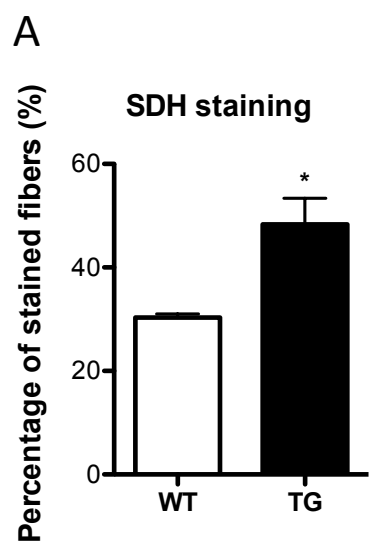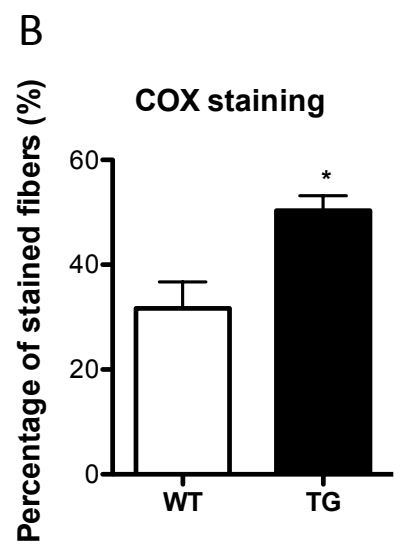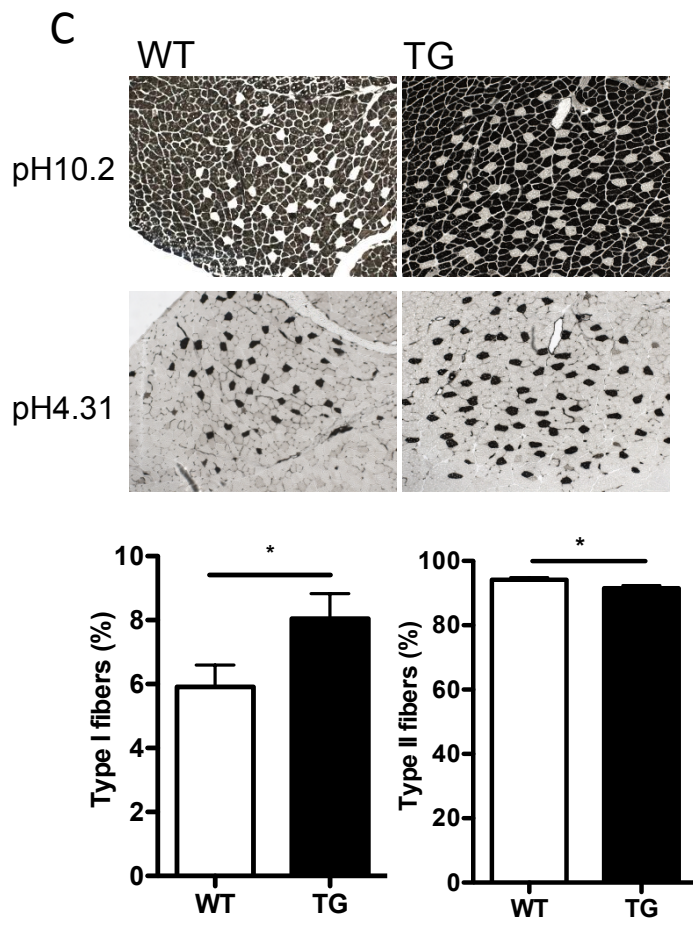

Supplement: pgen.1004490.s002.pdf [file pgen.1004490.s002.pdf]
